# Supplementary material
Source: PubMed Central journal article supplement (PMC7790861)
Supplement: NIHMS1638489-supplement-suppl.pdf [file NIHMS1638489-supplement-suppl.pdf]

## Supplemental Appendix 1

- I. A list of conditions and diseases for which there is evidence that senescent cells play a *causal* role in pathogenesis and therefore are alleviated by senolytic drugs.

| Condition                                    | References      |
|----------------------------------------------|-----------------|
| Diabetes and obesity                         | (1-5)           |
| Cardiac dysfunction                          | (6-8)           |
| Vascular hyporeactivity/ calcification       | (6)             |
| AV fistulae                                  | (9)             |
| Frailty                                      | (10-13)         |
| Age-related muscle loss (sarcopenia)         | (14)            |
| Chemotherapy complications                   | (11; 13; 15-17) |
| Radiation complications                      | (18)            |
| Cancers                                      | (11)            |
| Bone marrow transplant complications         | (16)            |
| Organ transplantation complications          | (19; 20)        |
| Myeloma/ MGUS                                | (21)            |
| Age-related cognitive dysfunction            | (22)            |
| Alzheimer's disease                          | (23; 24)        |
| Parkinson's disease                          | (25)            |
| Amyotrophic lateral sclerosis                | (26)            |
| Ataxia                                       | (10)            |
| Obesity-related neuropsychiatric dysfunction | (27)            |
| Renal dysfunction                            | (28; 29)        |
| Urinary incontinence                         | (10)            |
| Osteoporosis                                 | (30-32)         |
| Osteoarthritis                               | (33)            |
| Age-related intervertebral disk disease      | (10; 34)        |
| Idiopathic pulmonary fibrosis                | (13; 35)        |
| Hyperoxic lung damage                        | (36)            |
| Chronic obstructive pulmonary disease        | (37)            |
| Tobacco                                      | (38)            |
| Hepatic steatosis                            | (39)            |
| Cirrhosis                                    | (40)            |
| Primary biliary cirrhosis                    | (41)            |
| Progerias                                    | (10; 12)        |
| Pre-eclampsia                                | (42)            |
| Macular degeneration                         | (43; 44)        |
| Glaucoma                                     | (45-47)         |
| Cataracts                                    | (48)            |
| Prostatic hypertrophy                        | (49-51)         |
| Psoriasis                                    | (52)            |
| Healthspan                                   | (10-12)         |
| Lifespan                                     | (10-12)         |

II. Clinical trials on senotherapeutics in 2019-2020.

**HSCT (human stem cell transplant) D+Q trial:** Phase II open-label in bone marrow transplant survivors to reduce chemotherapy-induced frailty and senescent cell burden

**HSCT (human stem cell transplant) fisetin trial:** Phase II open-label in bone marrow transplant survivors to reduce chemotherapy-induced frailty and senescent cell burden

**Diabetic renal disease D+Q trial:** Phase IIb double-blind trial in diabetic renal disease subjects to test if the combination of Dasatinib plus quercetin reduces frailty, renal dysfunction and insulin resistance, while increasing adipose-derived stem cell function

**Diabetic renal disease fisetin trial:** Phase IIb double-blind trial in diabetic renal disease subjects to test if fisetin reduces frailty, renal dysfunction and insulin resistance, while increasing adipose-derived stem cell function

**AFFIRM (Alleviation by Fisetin of Frailty, Inflammation, and Related Measures in Older Adult) trial:** Phase II double-blind trial in elderly female subjects residing in a long-term care facility to reduce frailty, bone resorption, inflammation, and insulin resistance.

**Short-term AFFIRM trial:** Phase IIb double blind trial in elderly subjects with frailty to reduce senescent cell abundance

**Idiopathic pulmonary fibrosis (IPF) D+Q trial:** Multi-center Phase IIb trial in subjects with idiopathic pulmonary fibrosis to increase pulmonary and physical function

**Osteoarthritis fisetin trial:** Phase I/II trial in subjects with symptomatic knee arthritis to reduce senescence and SASP and improve MRI, physical performance and other objective clinical data.

**Osteoarthritis UBOX101 trial:** Randomized, double-blind, placebo-controlled study to assess the safety, tolerability, and clinical effects of single and repeat dose, intra-articular administration of a senolytic drug targeting p53/MDM2 in patients with symptomatic knee osteoarthritis.

**Skeletal health fisetin trial:** Phase II open-label trial to evaluate the whether fisetin improves skeletal health in the elderly as measured by percent change in amino-terminal pro-peptide of type I collagen [P1NP] and C-terminal telopeptide of type I collagen [CTX].

**Skeletal health D+Q trial:** Phase II open-label trial to evaluate whether D+Q improves skeletal health in the elderly as measured by percent change in amino-terminal propeptide of type I collagen (P1NP) and C-terminal telopeptide of type I collagen (CTX).

**Alzheimer's disease D+Q trial:** Phase I/II open-label trial to evaluate target engagement and to establish the feasibility and safety of D+Q treatment in older adults with early stage AD.

## Literature Cited

1. Palmer AK, Xu M, Zhu Y, Pirtskhalava T, Weivoda MM, et al. 2019. Targeting senescent cells alleviates obesity-induced metabolic dysfunction. *Aging Cell* 18:e12950
2. Palmer AK, Gustafson B, Kirkland JL, Smith U. 2019. Cellular senescence: at the nexus between ageing and diabetes. *Diabetologia* 62:1835-41
3. Palmer AK, Kirkland JL. 2016. Aging and adipose tissue: potential interventions for diabetes and regenerative medicine. *Exp Gerontol* 86:97-105
4. Aguayo-Mazzucato C, Andle J, Lee TB, Jr., Midha A, Talemal L, et al. 2019. Acceleration of beta Cell Aging Determines Diabetes and Senolysis Improves Disease Outcomes. *Cell Metab* 30:129-42 e4
5. Hickson LJ, Langhi Prata LGP, Bobart SA, Evans TK, Giorgadze N, et al. 2019. Senolytics decrease senescent cells in humans: Preliminary report from a clinical trial of Dasatinib plus Quercetin in individuals with diabetic kidney disease. *EBioMedicine* 47:446-56
6. Roos CM, Zhang B, Palmer AK, Ogrodnik MB, Pirtskhalava T, et al. 2016. Chronic senolytic treatment alleviates established vasomotor dysfunction in aged or atherosclerotic mice. *Aging Cell* 15:973-7
7. Lewis-McDougall FC, Ruchaya PJ, Domenjo-Vila E, Shin Teoh T, Prata L, et al. 2019. Aged-senescent cells contribute to impaired heart regeneration. *Aging Cell* 18:e12931
8. Anderson R, Lagnado A, Maggiorani D, Walaszczyk A, Dookun E, et al. 2019. Length-independent telomere damage drives post-mitotic cardiomyocyte senescence. *The EMBO journal* 38:e100492
9. Nath KA, O'Brien DR, Croatt AJ, Grande JP, Ackerman AW, et al. 2018. The murine dialysis fistula model exhibits a senescence phenotype: Pathobiologic mechanisms and therapeutic potential. *Am J Physiol Renal Physiol* 315:F1493-9
10. Zhu Y, Tchkonja T, Pirtskhalava T, Gower AC, Ding H, et al. 2015. The Achilles' heel of senescent cells: from transcriptome to senolytic drugs. *Aging Cell* 14:644-58
11. Xu M, Pirtskhalava T, Farr JN, Weigand BM, Palmer AK, et al. 2018. Senolytics improve physical function and increase lifespan in old age. *Nat Med* 24:1246-56
12. Yousefzadeh MJ, Zhu Y, McGowan SJ, Angelini L, Fuhrmann-Stroissnigg H, et al. 2018. Fisetin is a senotherapeutic that extends health and lifespan. *EBioMedicine* 36:18-28
13. Schafer MJ, White TA, Iijima K, Haak AJ, Ligresti G, et al. 2017. Cellular senescence mediates fibrotic pulmonary disease. *Nat Commun* 8:14532
14. Larsson L, Degens H, Li M, Salviati L, Lee YI, et al. 2019. Sarcopenia: Aging-Related Loss of Muscle Mass and Function. *Physiol Rev* 99:427-511
15. Chang J, Wang Y, Shao L, Laberge RM, Demaria M, et al. 2016. Clearance of senescent cells by ABT263 rejuvenates aged hematopoietic stem cells in mice. *Nat Med* 22:78-83
16. Cupit-Link MC, Kirkland JL, Ness KK, Armstrong GT, Tchkonja T, et al. 2017. Biology of premature ageing in survivors of cancer. *ESMO Open* 2:e000250

17. Ness KK, Armstrong GT, Kundu M, Wilson CL, Tchkonina T, Kirkland JL. 2014. Frailty in childhood cancer survivors. *Cancer* 121:1540-7
18. Pan J, Li D, Xu Y, Zhang J, Wang Y, et al. 2017. Inhibition of Bcl-2/xl With ABT-263 Selectively Kills Senescent Type II Pneumocytes and Reverses Persistent Pulmonary Fibrosis Induced by Ionizing Radiation in Mice. *Int J Radiat Oncol Biol Phys* 99:353-61
19. van Willigenburg H, de Keizer PLJ, de Bruin RWF. 2018. Cellular senescence as a therapeutic target to improve renal transplantation outcome. *Pharmacol Res* 130:322-30
20. Lau A, Kennedy BK, Kirkland JL, Tullius SG. 2019. Mixing old and young: enhancing rejuvenation and accelerating aging. *The Journal of clinical investigation* 129:4-11
21. Andre T, Meuleman N, Stamatopoulos B, De Bruyn C, Pieters K, et al. 2013. Evidences of early senescence in multiple myeloma bone marrow mesenchymal stromal cells. *PLoS One* 8:e59756
22. Govoni S, Amadio M, Battaini F, Pascale A. 2010. Senescence of the brain: focus on cognitive kinases. *Curr Pharm Des* 16:660-71
23. Musi N, Valentine JM, Sickora KR, Baeuerle E, Thompson CS, et al. 2018. Tau protein aggregation is associated with cellular senescence in the brain. *Aging Cell* 17:e12840
24. Zhang P, Kishimoto Y, Grammatikakis I, Gottimukkala K, Cutler RG, et al. 2019. Senolytic therapy alleviates A $\beta$ -associated oligodendrocyte progenitor cell senescence and cognitive deficits in an Alzheimer's disease model. *Nat Neurosci* 22:719-28
25. Chinta SJ, Woods G, Demaria M, Rane A, Zou Y, et al. 2018. Cellular Senescence Is Induced by the Environmental Neurotoxin Paraquat and Contributes to Neuropathology Linked to Parkinson's Disease. *Cell Reports* 22:930-40
26. Vazquez-Villasenor I, Garwood CJ, Heath PR, Simpson JE, Ince PG, Wharton SB. 2019. Expression of p16 and p21 in the frontal association cortex of ALS/MND brains suggests neuronal cell cycle dysregulation and astrocyte senescence in early stages of the disease. *Neuropathol Appl Neurobiol* 46:171-85
27. Ogrodnik M, Zhu Y, Langhi LGP, Tchkonina T, Krüger P, et al. 2019. Obesity-Induced Cellular Senescence Drives Anxiety and Impairs Neurogenesis. *Cell Metab* 29:1061-77.e8
28. Palmer AK, Tchkonina T, LeBrasseur NK, Chini EN, Xu M, Kirkland JL. 2015. Cellular Senescence in Type 2 Diabetes: A Therapeutic Opportunity. *Diabetes* 64:2289-98
29. Kim SR, Jiang K, Ogrodnik M, Chen X, Zhu XY, et al. 2019. Increased renal cellular senescence in murine high-fat diet: effect of the senolytic drug quercetin. *Transl Res* 213:112-23
30. Farr JN, Fraser DG, Wang H, Jaehn K, Ogrodnik MB, et al. 2016. Identification of Senescent Cells in the Bone Microenvironment. *J Bone Miner Res* 31:1920-9
31. Farr JN, Rowsey JL, Eckhardt BA, Thicke BS, Fraser DG, et al. 2019. Independent Roles of Estrogen Deficiency and Cellular Senescence in the

- Pathogenesis of Osteoporosis: Evidence in Young Adult Mice and Older Humans. *J Bone Miner Res* 34:1407-18
32. Farr JN, Xu M, Weivoda MM, Monroe DG, Fraser DG, et al. 2017. Targeting cellular senescence prevents age-related bone loss in mice. *Nat Med* 23:1072-9
  33. Xu M, Bradley EW, Weivoda MM, Hwang SM, Pirtskhalava T, et al. 2016. Transplanted senescent cells induce an osteoarthritis-like condition in mice. *J Gerontol A Biol Sci Med Sci* 72:780-5
  34. Patil P, Dong Q, Wang D, Chang J, Wiley C, et al. 2019. Systemic clearance of p16(INK4a) -positive senescent cells mitigates age-associated intervertebral disc degeneration. *Aging Cell* 18:e12927
  35. Justice JN, Nambiar AM, Tchkonja T, LeBrasseur NK, Pascual R, et al. 2019. Senolytics in idiopathic pulmonary fibrosis: Results from a first-in-human, open-label, pilot study. *EBioMedicine* 40:554-63
  36. Parikh P, Britt RD, Jr., Manlove LJ, Wicher SA, Roesler A, et al. 2018. Hyperoxia-Induced Cellular Senescence in Fetal Airway Smooth Muscle Cells. *Am J Respir Cell Mol Biol* 61:51-60
  37. Barnes PJ, Baker J, Donnelly LE. 2019. Cellular Senescence as a Mechanism and Target in Chronic Lung Diseases. *Am J Respir Crit Care Med* 200:556-64
  38. Nyunoya T, Monick MM, Klingelutz A, Yarovinsky TO, Cagley JR, Hunninghake GW. 2006. Cigarette smoke induces cellular senescence. *Am J Respir Cell Mol Biol* 35:681-8
  39. Ogrodnik M, Miwa S, Tchkonja T, Tiniakos D, Wilson CL, et al. 2017. Cellular senescence drives age-dependent hepatic steatosis. *Nat Commun* 8:15691
  40. Moncsek A, Al-Suraih MS, Trussoni CE, O'Hara SP, Splinter PL, et al. 2017. Targeting senescent cholangiocytes and activated fibroblasts with Bcl-xL inhibitors ameliorates fibrosis in Mdr2<sup>-/-</sup> mice. *Hepatology* 67:247-59
  41. Tabibian JH, O'Hara SP, Splinter PL, Trussoni CE, LaRusso NF. 2014. Cholangiocyte senescence by way of N-ras activation is a characteristic of primary sclerosing cholangitis. *Hepatology* 59:2263-75
  42. Suvakov S, Cubro H, White WM, Butler Tobah YS, Weissgerber TL, et al. 2019. Targeting senescence improves angiogenic potential of adipose-derived mesenchymal stem cells in patients with preeclampsia. *Biol Sex Differ* 10:49
  43. Sun S, Cai B, Li Y, Su W, Zhao X, et al. 2019. HMGB1 and Caveolin-1 related to RPE cell senescence in age-related macular degeneration. *Aging* 11:4323-37
  44. Blasiak J. 2020. Senescence in the pathogenesis of age-related macular degeneration. *Cell Mol Life Sci* 77:789-805
  45. Liton PB, Challa P, Stinnett S, Luna C, Epstein DL, Gonzalez P. 2005. Cellular senescence in the glaucomatous outflow pathway. *Exp Gerontol* 40:745-8
  46. Phatak NR, Stankowska DL, Krishnamoorthy RR. 2016. Bcl-2, Bcl-xL, and p-AKT are involved in neuroprotective effects of transcription factor Brn3b in an ocular hypertension rat model of glaucoma. *Mol Vis* 22:1048-61
  47. Caprioli J. 2013. Glaucoma: a disease of early cellular senescence. *Invest Ophthalmol Vis Sci* 54:ORSF60-7
  48. Fu Q, Qin Z, Yu J, Yu Y, Tang Q, et al. 2016. Effects of senescent lens epithelial cells on the severity of age-related cortical cataract in humans: A case-control study. *Medicine (Baltimore)* 95:e3869

49. Castro P, Giri D, Lamb D, Ittmann M. 2003. Cellular senescence in the pathogenesis of benign prostatic hyperplasia. *Prostate* 55:30-8
50. Choi J, Shendrik I, Peacocke M, Peehl D, Buttyan R, et al. 2000. Expression of senescence-associated beta-galactosidase in enlarged prostates from men with benign prostatic hyperplasia. *Urology* 56:160-6
51. Vital P, Castro P, Tsang S, Ittmann M. 2014. The senescence-associated secretory phenotype promotes benign prostatic hyperplasia. *Am J Pathol* 184:721-31
52. Covre LP, Martins RF, Devine OP, Chambers ES, Vukmanovic-Stejic M, et al. 2018. Circulating Senescent T Cells Are Linked to Systemic Inflammation and Lesion Size During Human Cutaneous Leishmaniasis. *Front Immunol* 9:3001
